# Supplementary material for: Cooperation, cis-interactions, versatility and evolutionary plasticity of multiple cis-acting elements underlie krox20 hindbrain regulation
Source: PubMed Central journal article supplement (PMC6095606; doi:10.1371/journal.pgen.1007581), 2018-08-06
Supplement: pgen.1007581.s002.pdf [file pgen.1007581.s002.pdf]

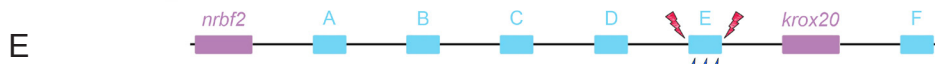

gcccctgcaggcagcgtttttacgcagcgggatgcccttccagccgcaaccatctctgggaaataattcagattctatatgttttttaaaaaagttatgttgattat  
 tttttttgtttctgttttcttacatttcataaaatccccaaagaccacacttgcagctaaaaggttcaactactgaagtagaattcaacCTATACTTTGGTTGAGGGT  
 GAGTAAACTAACAATATTTATTTTGGTGAACACGCCTTTAAAGGGGATAACTGTCTCATTGACATCCGAAGTTCTGATAGTGTACATAATGCATTATGGATCT  
 TTCATATTCATAGCTGCACATAAAGATCACAGCTGCTATAAATGAACCTTACTATTAAGTGTCAATTTGCTACTGTAAGACAGCTCCAGAAGAAAGCTCAGC  
 TCGACACAAAAGCTCTCAATTTTGCACAGAACAGCGACAATCTTTGCCACTGACGTGGCGCATCTGAATGCTTCAATTTTCAGGGATTTCTGCGTCC**CCCCAC**  
**AAATGAAAGAAAGAAACTTCTTCAGATGCATGTGTCTTTTGTGTGACCGCTACAGATGCAAAAATGTTCACACACTGTGCAGAAGCGCCCGCTTTGGCAGAGCGTG**  
 CCGGGCCCGCAATGCCATTGGCAGCTGGGATCTGGCTGTCCCTGCTGGGAATGATGGTCTCAATGTAATGGACT**CCCCACACATGGCAGCCACTGAAT**TCAAGAG  
 CTTTCTTTCTTGCATGTGCTCGAGGTCTCGAGAGGTCAAATGACTTCTGCACATTGAGGATACATAGAATGACATCTTCTGCATCAGCCCTTTGCATTTTCTCT  
 CTCTGTTTCATTTGCTCTATTACTCATCAAGTTGGCTGTGAGATCGGCACACAGCAAAAAGCAAAATCAGACAACCTGACTCACAAATTAAGTAAATAGGTCAG  
 TTTACAACCTTTATCTTTATACAGGTTACTTAATTTGTCAAATAAATTTCTAGGCACATAAATTTGCGAAAATTTAGGCTGTGTACTGTAAAAAAGACAATCAA  
 CATTGTCTTATTCATGGATTACATTAAGTCAAAAAAAGAAAGAAAGTACATAGAATCTAACAAAATATCTCAGCTCTTTGGGTCAAATGTAATTCAGTGTCTGCT  
 GATCTACTCAATTTTGAATGGGATTTTGAAGTCTTTCTGAATGTTAAGCTGCAATTACTGCCA**ACCACATGCTTATAATTTCTGGGATTTCTGAAGCA**  
 TTTGTTGTCAAACACAAAACaaactgctctcatgcaagcttaactatggagccagatcactctcaagtcgacgc

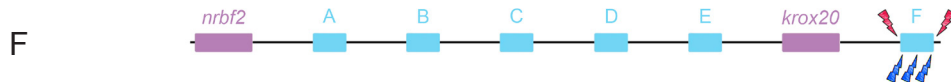

tgctagctgggctatttcacacaattttgatttcatactgaatttaaaccctcaggatctcttaggaagcattcggctttattcatttact**tgcatatcactaaaga**  
**caa**CGGCTTCTGCTAAAAATCACCTTTAATATCCTACTAAAGCAATAAAATTAATCATCTTTAATGACCTGAGGAGGACTAAAAAACAGCTTTTGGGGTGAAC  
 TATCCCTCTAATCGCTCTCTTTGGCAAGACAGGAAATGATTTCATCACTCAACCTTTCTTCATGAGGCATTCGTACCCTATTATCATTAGTGTTCATGCATAG  
 TAAAACCTCAGCGTTTGTATTAGAGTCCGAAGCATGGCTGTTCATTTGCTCAGCTCCCTGGTAAACATCCATTTATCTGTTCACAGACTCACACGCACACACATA  
 CAATCAGCAGCTCTGTAAAGAGGAGGAAGTCAAATCTCCAAACTGACATCAAGTCTTCATACATCTCCATTCAGCCCGACCTGGGATATGAATACAATGCAGG  
 AAAATGCAAGGAATGCTTCTCAATGTCTGAGGAGGATCAGTGGCTCAGAGCGGCTGGCGGCTCCAGGAGCTCGGGATGGAAGGCCACCGGCAGGGGAGCGAGCCCA  
 GCAGAGTGAACCGCAACTGGATGAGGTCTCTCATACGACGGGCGGCTTCAATCTTGATCCTCAACAATAACAGGGGGACAGGACAAGCCATCAGTCTCCATTA  
 CGGAGACACTGTTTCTCTCAAATTAACCTCTCTGTCGTCTCCACAGCGTCTATAGGAGCGGCTCTCTGTGCATCATTTCGCTCACAAAAGCTTGAAAGCCCC  
**TGGAGGGGAGAGAGCT**TCTTCTGCTCTGTTGGCCCTCTCGCATGTCCGTCACCTTGACAGGACCGTCTCTGCTGACAAGGGGGAAATTAGCATAGCAAT  
 GGAGACCCTCTCAAGGCTGACAGGGGGGACATTTGACTGTAAGTACTTACCGTCTGACTGTGGTCCCCCCACCCACAAAACCTACCATGACAAGGCTCTCTA  
 AAAGTTGTGAATCATGAAAACATGTGACCATATATCAATAAAATTTATGCTTATGTTGACAGGTTTATTTTGGCAGTTACCAAAAAACACTATCAATGTTAA  
 AGATTTTCTTTTGGCAAAATTCATTTGAATATTAAGTAAAGATTGTGTTTCGATGAAAATTTTATAGTAAATTTACAAAAGTAAATACATAAAAAATGTAATTTT  
 GATTACTTATATCCATCTTAAGCACTTAATTTAGACAattttaagacgattttctaggaatttagatttttttaaccctcagagtacagaatttcaaatatttg  
 tatcttggccacatattgtcattgtcatatccctaacaagggatttatgacaaaacacttactgtatcactggttgg

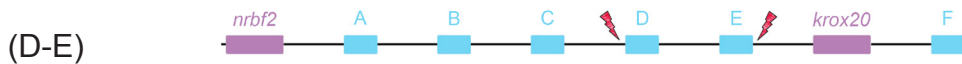

ctttataatctgggctgcacacagcggatgaaccgcatccagcagcgtttttacgcagcgggatgcccttccagccgcaaccatctctgggaaataattcagat  
 tctatatgttttttaaaaaagttatgttgatttattttttgtttctgtttcttacatttcataaaatCCCCAAAGACCACACTTGCAGCTAAAAGGTTCAACTAC  
 TGAAGTAGAAATTCACCTACTCTTGGTTGAGGGTGAATAAATAAACAATTTATTTTGGTGAACACGCTTTA  
 ACCTGGATGCCTTAAATTTTAAAGCTGAATCAAATATACCTTATGTCTTATGAACTTATATGATAAATGTTAACCTGACTTAAAACAGCTTGCATAATTTATAAA  
 ATTAAGTTATAACATGATAAACCCTAGTTTAAATGTTAATAAATAAACAATATGTTGTCAGGACTAAAT  
 TTTCCAGTGATTTAAAAAATATTT**TCCCAAGTCTTTTGTAA**Tggattgttttaaatagttttaataactagttttaaatgtattaaataaattagtcattgt  
 ctaactctgtatataagtttccgtagctgttttaa

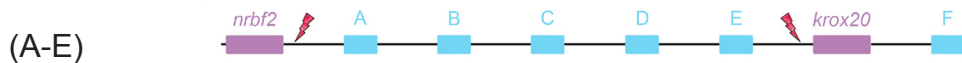

ccctggtctagactgagcataatcctcatttttgaagagatctcattatcagttcaataaattgagcatttttggttcttcaacctgacagaagcttgaatg  
 ggagtcataatcggccccacacacaggaacctcagatcagccccctgttttgatagtagacaataaaaaaaatccc**ataGCTTCCTGTGTCGGT**CAATCAATG  
 AGTATTTTATCGCCACCATGCAAGCTCGGGCTATTTTGGAGACGTTGCTGTC  
 ATCTCAAACCA**CTGGATAGAAAACCTAATG**TACATTGtcaaaaatgcacacagtggttgacagcagagaacttaagttgactgttagttttacacatttaa  
 gtgaatttaacataaaaacagtttaagatatatacacaaggtggccatttgtatggatactccttaataaaaataggaatggttggggatttcaactcctgtttgtg  
 cacattagatatgtgagggggcaaaactttcaagatgggtgatgacctggtg

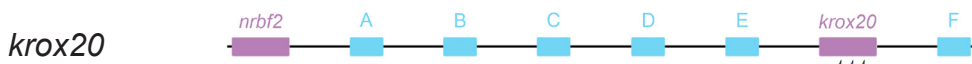

agttgaaagttcactggtttgaactggacgagcagatgctcgtggcgacgcccgcctctgagctggacactcctgtggacgagcagaggactttcgcctttttgt  
 cgcaggtgatttttgg**gtctctctctctctcctcctcgcgaacttctccgcgaaa**agtcgcagggcaacggttttccgctgtgctg**gcgaatgtggt**  
**gctcaggtgctcctcgcg**actaaaagttcctc**atg**catatccgacactggaaggttttggcc**ggtggtgagcggatgtctcgtgataaagttcctccgagcgcgaga**  
 agcgcctgtcgcagccctccgcccagcaggggataggccgctcgtgcacgggctctgtggtgctgttgggtatttccctggacgagcagattggcctgaggggc  
 aaattctcgcgagtgtaagctgtgggttagccgggtccgctcaggcactggtcccctagcgtgaagttcctgatagtgctcagggggttagaggagcggtaatt  
 gaaagagtcacagggcagagaaacggttgcggtcgggcatcagctgcatgctcctctggcagggaggttggaaaaagccgctgagtcgggattatagggaaaca  
 acccagagtcgctggttggctttgagagagagtaggtagggcagagatagagatggacaggtgaggtggaaggaagcagcagcgggtcttgatagacotctccg  
 catccagagtagggcggcgggggagtagatgtctccatgtctgcttggctctgcgcatggtgcagctgagagtgctggagaagtggtgggggagactgagga  
 tgcaggtgacgaggtgctgaggtggtcggctcagccagatcccgcgctcagatgttgatcagccctctgggtccagtttcccggtgactgggagtcga  
 tggaaaaacttcccagtaggtaaaagtttggctgcgagggccagctggttgcgcaagctgctggagtaggctaagtcgagggcgcgcttctcctgctcactatcc  
 ccgtaatacagccat

**S2 Fig. Sequences of the different regions of the zebrafish *krox20* locus in which deletions were introduced.**

Each panel shows the entire (A to F and *krox20*) or partial, (D-E) and (A-E), nucleotide sequence of the considered region. The DNA fragments with enhancer activity that were used to drive GFP expression in transgenic lines are shown in green. The target sequences for the guide RNAs used to generate the germline deletions are shown in red and the sequences eliminated in those deletions are indicated by capital letters. The target sequences for the guide RNAs used to generate the somatic deletions are shown in blue. Putative Krox20 binding sites in elements A, D and E are underlined (pink). The sequence encoding Krox20 zinc fingers is underlined (black) and the single nucleotide mutated (G to A) in *krox20fh227/fh227* is shown in orange. Diagrams above the sequences indicate the approximate positions of the targeted sequences within the locus.
