# Supplementary material for: Cooperation, cis-interactions, versatility and evolutionary plasticity of multiple cis-acting elements underlie krox20 hindbrain regulation
Source: PubMed Central journal article supplement (PMC6095606; doi:10.1371/journal.pgen.1007581), 2018-08-06
Supplement: pgen.1007581.s004.pdf [file pgen.1007581.s004.pdf]

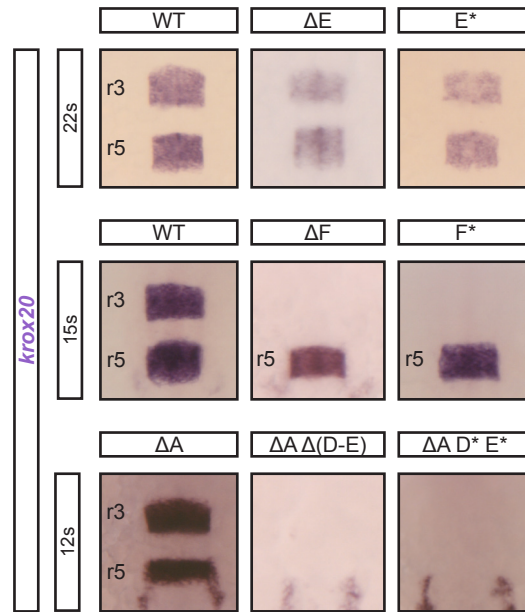

**S4 Fig. Very similar phenotypes obtained following germ-line or somatic deletion.**

Embryos from three lines carrying homozygous deletions of a cis-acting element ( $\Delta$ ) or F0 embryos carrying mutations (\*) in the same elements were analysed for the expression of *krox20* by in situ hybridization at the indicated stages. WT, wild type control. Positions of r3 and r5 are shown.
