# Supplementary material for: Cooperation, cis-interactions, versatility and evolutionary plasticity of multiple cis-acting elements underlie krox20 hindbrain regulation
Source: PubMed Central journal article supplement (PMC6095606; doi:10.1371/journal.pgen.1007581), 2018-08-06
Supplement: pgen.1007581.s006.pdf [file pgen.1007581.s006.pdf]

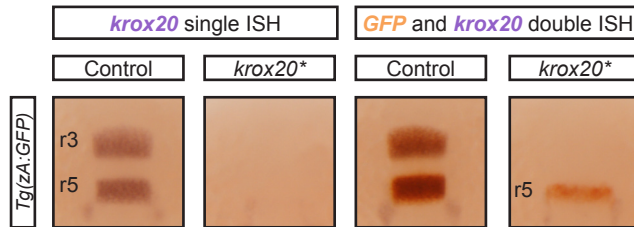

**S6 Fig. Loss of Krox20 activity in embryos injected with guide RNAs targeting sequences encoding Krox20's zinc fingers.**

Transgenic 12s embryos carrying the GFP reporter driven by the A enhancer were either uninjected (Control) or injected with Cas9 and guide RNAs targeting the coding sequence of Krox20's zinc fingers (*krox20*\*) and analysed by single in situ hybridization with a *krox20* probe (purple labelling) or double in situ hybridization with *krox20* (purple labelling) and GFP (orange labelling) probes.
