# Supplementary material for: Cooperation, cis-interactions, versatility and evolutionary plasticity of multiple cis-acting elements underlie krox20 hindbrain regulation
Source: PubMed Central journal article supplement (PMC6095606; doi:10.1371/journal.pgen.1007581), 2018-08-06
Supplement: pgen.1007581.s007.pdf [file pgen.1007581.s007.pdf]

| Sequence | ZED Cloning primers                                                                | CRISPR/Cas9 germline deletion guides                                                                           | CRISPR/Cas9 somatic deletion guides                                                                                | Genotyping primers                                                             |
|----------|------------------------------------------------------------------------------------|----------------------------------------------------------------------------------------------------------------|--------------------------------------------------------------------------------------------------------------------|--------------------------------------------------------------------------------|
| zA       | Forward: 5'-AGAGCCTATGTTGGAAACAACAC-3'<br>Reverse: 5'-TAGCGTAGTAGGCCAGTAAAG-3'     | 5'-GGAGAGACAATTTTTTATG-3'<br>5'-GGATACATCGTGCCGCTTAG-3'                                                        | 5'-TCTTTTAGGGCGCTGTGTG-3'<br>5'-CACTGGAATCTGCGGTAGG-3'<br>5'-TGTGCTGACGAGAAGAGAGC-3'<br>5'-AAATGCAGAGTAAACAATT-3'  | Forward: 5'-GTGTGGGAAGCAAAATATAGA-3'<br>Reverse: 5'-GGGTTAGGTGTACACATTTCATA-3' |
| zB       | Forward: 5'-GGTAAATCTCCACCATFCGA-3'<br>Reverse: 5'-CACCGCCGAAAACAATAGCG-3'         | 5'-GATAAAGGGGAGTTTAC-3'<br>5'-GGACCATTCAACATTGTT-3'                                                            | NA                                                                                                                 | Forward: 5'-ACCATCCGCCACACCTAAA-3'<br>Reverse: 5'-CCGACCAACCAACCCACAGA-3'      |
| zC       | Forward: 5'-GGGATAAAGGTAAGTCAGAGCT-3'<br>Reverse: 5'-TGGTTCATTAGGGGATTGTG-3'       | 5'-GGCCTTTGTGCTTCACCCC-3'<br>5'-GGAATAAAGAATAGGTAGA-3'                                                         | 5'-CCGGCCCTGCAGGTGGTAT-3'<br>5'-CTCCGTGATTATCATCATT-3'<br>5'-ACCAGCATTATGGCTGTGTC-3'<br>5'-GGCCAGCGGTGGTCAGTGGG-3' | Forward: 5'-ACTCAACCGCTGGGTTAAA-3'<br>Reverse: 5'-CAGCTCTGGTTTCCCTCAA-3'       |
| zD       | Forward: 5'-CTTTCCCAAAACAAGTGAGCCT-3'<br>Reverse: 5'-GCAAGCTGTTTTAAGTCAGGTTAAC-3'  | 5'-ACCCATCTAAATTTTGT-3'<br>5'-TGTGTTGCGGAGTCTCCCA-3'<br>5'-TGTCTTTTAACCGAGTAGG-3'<br>5'-TTTTCTTAGTGATTTGTGT-3' | 5'-ACCTCATCTAAATTTTGT-3'<br>5'-TGTGTTGCGGAGTCTCCCA-3'<br>5'-TGTCTTTTAACCGAGTAGG-3'<br>5'-TTTTCTTAGTGATTTGTGT-3'    | Forward: 5'-CATGGAATCTATTTCTTTCCC-3'<br>Reverse: 5'-GCTAGCGAAACTTATACAATG-3'   |
| zE       | Forward: 5'-CACGTTTTTACGCGAGCG-3'<br>Reverse: 5'-TTGAGAGTGATCTGGCTC-3'             | 5'-TAGCTGCAAGTGTGGTCTTT-3'<br>5'-AACCCAATGTTATAATTCT-3'                                                        | 5'-CCTTCTTTCATTTGTGGGG-3'<br>5'-GCAACATTTTGCATCTGT-3'<br>5'-ATTCAGTGGCTGCCATGTGT-3'                                | Forward: 5'-CGCAACCCATCTCTGGAAAT-3'<br>Reverse: 5'-TGGCTCCATAGTTAAGCTGCA-3'    |
| zF       | Forward: 5'-GATTATCACCTCAACCTTTTC-3'<br>Reverse: 5'-ACCACAGTACGACGTTAGAG-3'        | 5'-TTGCATATCACTAAGACAA-3'<br>5'-GATATGACAATGCAATATG-3'                                                         | 5'-CTTGATCCTCAACAATAACA-3'<br>5'-TGTGGAGAACACGACAGAGA-3'<br>5'-AGCTCTCTCCCTCCAGG-3'                                | Forward: 5'-TGTAGCTGGGCTATTTTACAC-3'<br>Reverse: 5'-ACCAACAGTGATACAGTAAGTG-3'  |
| (D-E)    | NA                                                                                 | 5'-TAGCTGCAAGTGTGGTCTTT-3'<br>5'-TTCCCAAGTCTTTGTAAA-3'                                                         | NA                                                                                                                 | Forward: 5'-CGCAACCCATCTCTGGAAAT-3'<br>Reverse: 5'-GCTAGCGAAACTTATACAATG-3'    |
| (A-E)    | NA                                                                                 | 5'-ACGGACAACGGAAGCTATG-3'<br>5'-CATTAGGTTTTCTATCCAG-3'                                                         | NA                                                                                                                 | Forward: 5'-CTGTCAATCTATGGACAGAGAAC-3'<br>Reverse: 5'-GCTGTCCAACACTGTGTGC-3'   |
| Egr2b    | NA                                                                                 | NA                                                                                                             | 5'-TTTGGGGAGAAAGTTCCGC-3'<br>5'-TGCGAATGTGGTCTCAGG-3'<br>5'-GGTGTGGATGCGGATGTGC-3'                                 | Forward: 5'-TGGTTTGAAGTGGACGAGCAG-3'<br>Reverse: 5'-CAAGGAATACCCCAACAGACC-3'   |
| kA       | Forward: 5'-TTGTGGATAATGCCTCCTGTA-3'<br>Reverse: 5'-GTAGGCCATAATCACACCAATTG-3'     | NA                                                                                                             | NA                                                                                                                 | NA                                                                             |
| sA       | Forward: 5'-CTTATTGCTCATTTGAGGGAAGG-3'<br>Reverse: 5'-GACTCAITGAAACCCACCATTAAG-3'  | NA                                                                                                             | NA                                                                                                                 | NA                                                                             |
| xA       | Forward: 5'-GAGCCAAACTCTTCTTGCATTGCTC-3'<br>Reverse: 5'-GGAGTTTAGCAACAATGCTGGAG-3' | NA                                                                                                             | NA                                                                                                                 | NA                                                                             |
| cA       | Forward: 5'-CAGCTAAGGGAAGTCCAAATC-3'<br>Reverse: 5'-CTAAAATCCTGGTGTGCTGG-3'        | NA                                                                                                             | NA                                                                                                                 | NA                                                                             |
| mA       | Forward: 5'-CCACCTGACAGGTTGACTTC-3'<br>Reverse: 5'-GTTGCTCTCAACGAGTTTTCG-3'        | NA                                                                                                             | NA                                                                                                                 | NA                                                                             |

**S1 Table. Sequences of the 3' end of the cloning primers used for constructing the ZED constructs, the 5' end of CRISPR/Cas9 RNA guides used to create the germ-line and somatic deletions and the PCR primers used to detect the deletions.**
